# Supplementary material for: Effect of Associative Learning on Memory Spine Formation in Mouse Barrel Cortex
Source: Hindawi journal article supplement (doi:10.1155/2016/9828517), 2015-12-24
Supplement: f1 [file 9828517.f1.pdf]

## Supplementary Table 1

### Results of spine parameter measurements

| single-synapse spines                                   |                                                                       |                                                             |                            | double-synapse spines                                                 |                                                                     |                                        |
|---------------------------------------------------------|-----------------------------------------------------------------------|-------------------------------------------------------------|----------------------------|-----------------------------------------------------------------------|---------------------------------------------------------------------|----------------------------------------|
| parameter                                               | mean $\pm$ SEM                                                        | F/ t/ $\chi^2$                                              | P                          | mean $\pm$ SEM                                                        | F/ t/ $\chi^2$                                                      | P                                      |
| Volume of SA [ $\mu\text{m}^3$ ]                        | C: $0.031 \pm 0.004$<br>Cd: $0.038 \pm 0.012$<br>P: $0.057 \pm 0.011$ | F = 1.86                                                    | 0.17                       | C: $0.065 \pm 0.022$<br>Cd: $0.042 \pm 0.010$<br>P: $0.088 \pm 0.017$ | F = 1.83                                                            | 0.18                                   |
| Number of polyribosomes per sER-free spine              | C: $1.9 \pm 0.35$<br>Cd: $3.5 \pm 0.72$<br>P: $3.5 \pm 0.70$          | F = 6.14<br>$\chi^2 = 15.08$                                | <0.0001                    | C: $1.3 \pm 0.49$<br>Cd: $1.6 \pm 0.50$<br>P: $2.3 \pm 0.45$          | F = 9.40<br>$\chi^2 = 9.79$                                         | <0.0001                                |
| Number of polyribosomes per sER-containing spine        | C: $4.4 \pm 0.58$<br>Cd: $2.1 \pm 0.43$<br>P: $2.6 \pm 0.45$          |                                                             | < 0.001<br>< 0.001         | C: $2.3 \pm 0.60$<br>Cd: $2.3 \pm 0.30$<br>P: $2.2 \pm 0.49$          |                                                                     | > 0.05<br>> 0.05                       |
| Number of polyribosomes per SA-containing spine         | C: $6.4 \pm 0.83$<br>Cd: $5.0 \pm 0.76$<br>P: $6.3 \pm 1.01$          |                                                             | > 0.05<br>> 0.05           | C: $3.3 \pm 0.67$<br>Cd: $6.7 \pm 0.52$<br>P: $3.6 \pm 0.64$          |                                                                     | < 0.001<br>> 0.05                      |
| <b>Length</b> of sER-free spine [ $\mu\text{m}$ ]       | C: $0.54 \pm 0.04$<br>Cd: $0.64 \pm 0.09$<br>P: $0.76 \pm 0.04$       | F = 9.24<br>$t_{\text{CD}} = 0.00$<br>$t_{\text{P}} = 0.90$ | 0.0002<br>> 0.05<br>> 0.05 | C: $0.68 \pm 0.05$<br>Cd: $0.59 \pm 0.10$<br>P: $0.59 \pm 0.05$       | F = 4.97<br>$t_{\text{CD}} = 0.92$<br>$t_{\text{P}} = 0.92$         | 0.009<br>> 0.05<br>> 0.05              |
| <b>Length</b> of sER-containing spine [ $\mu\text{m}$ ] | C: $0.54 \pm 0.05$<br>Cd: $0.56 \pm 0.06$<br>P: $0.63 \pm 0.05$       | $t_{\text{CD}} = 0.99$<br>$t_{\text{P}} = 0.49$             | > 0.05<br>> 0.05           | C: $0.60 \pm 0.07$<br>Cd: $0.58 \pm 0.03$<br>P: $0.63 \pm 0.07$       | $t_{\text{CD}} = 0.14$<br>$t_{\text{P}} = 0.35$                     | > 0.05<br>> 0.05                       |
| <b>Length</b> of SA-containing spine [ $\mu\text{m}$ ]  | C: $0.62 \pm 0.04$<br>Cd: $0.60 \pm 0.07$<br>P: $0.90 \pm 0.06$       | $t_{\text{CD}} = 1.48$<br>$t_{\text{P}} = 1.73$             | > 0.05<br>> 0.05           | C: $0.80 \pm 0.09$<br>Cd: $0.66 \pm 0.06$<br>P: $0.84 \pm 0.07$       | $t_{\text{CD}} = 1.41$<br>$t_{\text{P}} = 0.42$                     | > 0.05<br>> 0.05                       |
| Diameter of sER-free spine head [ $\mu\text{m}$ ]       | C: $0.43 \pm 0.04$<br>Cd: $0.53 \pm 0.07$<br>P: $0.41 \pm 0.04$       | F = 1.83<br>$t_{\text{CD}} = 0.42$<br>$t_{\text{P}} = 0.10$ | 0.17<br>> 0.05<br>> 0.05   | C: $0.44 \pm 0.04$<br>Cd: $0.54 \pm 0.08$<br>P: $0.39 \pm 0.03$       | <b>F = 112.1</b><br>$t_{\text{CD}} = 2.52$<br>$t_{\text{P}} = 1.10$ | <b>&lt; 0.0001</b><br>< 0.05<br>> 0.05 |
| Diameter of sER-containing spine head [ $\mu\text{m}$ ] | C: $0.41 \pm 0.04$<br>Cd: $0.66 \pm 0.10$<br>P: $0.48 \pm 0.05$       | $t_{\text{CD}} = 1.09$<br>$t_{\text{P}} = 0.29$             | > 0.05<br>> 0.05           | C: $0.49 \pm 0.06$<br>Cd: $0.61 \pm 0.18$<br>P: $0.48 \pm 0.05$       | $t_{\text{CD}} = 2.89$<br>$t_{\text{P}} = 0.32$                     | < 0.05<br>> 0.05                       |

|                                                                 |                                                                       |                                                              |                                    |                                                                       |                                                              |                                    |
|-----------------------------------------------------------------|-----------------------------------------------------------------------|--------------------------------------------------------------|------------------------------------|-----------------------------------------------------------------------|--------------------------------------------------------------|------------------------------------|
| Diameter of SA-containing spine head [ $\mu\text{m}$ ]          | C: $0.62 \pm 0.08$<br>Cd: $0.82 \pm 0.15$<br>P: $0.68 \pm 0.05$       | $t_{\text{CD}} = 0.84$<br>$t_{\text{P}} = 0.27$              | $> 0.05$<br>$> 0.05$               | C: $0.73 \pm 0.05$<br>Cd: $0.96 \pm 0.13$<br>P: $0.68 \pm 0.08$       | $t_{\text{CD}} = 5.75$<br>$t_{\text{P}} = 1.03$              | $< 0.01$<br>$> 0.05$               |
| Diameter of sER-free spine neck [ $\mu\text{m}$ ]               | C: $0.27 \pm 0.04$<br>Cd: $0.27 \pm 0.03$<br>P: $0.22 \pm 0.02$       | F = 0.40<br>$t_{\text{CD}} = 0.07$<br>$t_{\text{P}} = 1.15$  | 0.67<br>$> 0.05$<br>$> 0.05$       | C: $0.24 \pm 0.03$<br>Cd: $0.30 \pm 0.03$<br>P: $0.23 \pm 0.04$       | F = 1.11<br>$t_{\text{CD}} = 1.24$<br>$t_{\text{P}} = 0.21$  | 0.33<br>$> 0.05$<br>$> 0.05$       |
| Diameter of sER-containing spine neck [ $\mu\text{m}$ ]         | C: $0.24 \pm 0.03$<br>Cd: $0.29 \pm 0.04$<br>P: $0.24 \pm 0.03$       | $t_{\text{CD}} = 0.99$<br>$t_{\text{P}} = 0.09$              | $> 0.05$<br>$> 0.05$               | C: $0.25 \pm 0.04$<br>Cd: $0.29 \pm 0.05$<br>P: $0.24 \pm 0.04$       | $t_{\text{CD}} = 0.73$<br>$t_{\text{P}} = 0.23$              | $> 0.05$<br>$> 0.05$               |
| Diameter of SA-containing spine neck [ $\mu\text{m}$ ]          | C: $0.27 \pm 0.02$<br>Cd: $0.29 \pm 0.04$<br>P: $0.26 \pm 0.02$       | $t_{\text{CD}} = 0.35$<br>$t_{\text{P}} = 0.38$              | $> 0.05$<br>$> 0.05$               | C: $0.29 \pm 0.02$<br>Cd: $0.32 \pm 0.03$<br>P: $0.27 \pm 0.03$       | $t_{\text{CD}} = 0.54$<br>$t_{\text{P}} = 0.46$              | $> 0.05$<br>$> 0.05$               |
| Excitatory PSD area of sER-free spine [ $\mu\text{m}^2$ ]       | C: $0.024 \pm 0.006$<br>Cd: $0.043 \pm 0.027$<br>P: $0.032 \pm 0.003$ | F = 19.58<br>$t_{\text{CD}} = 1.28$<br>$t_{\text{P}} = 0.57$ | $< 0.0001$<br>$> 0.05$<br>$> 0.05$ | C: $0.026 \pm 0.005$<br>Cd: $0.042 \pm 0.009$<br>P: $0.052 \pm 0.010$ | F = 15.00<br>$t_{\text{CD}} = 0.82$<br>$t_{\text{P}} = 1.31$ | $< 0.0001$<br>$> 0.05$<br>$> 0.05$ |
| Excitatory PSD area of sER-containing spine [ $\mu\text{m}^2$ ] | C: $0.059 \pm 0.021$<br>Cd: $0.038 \pm 0.037$<br>P: $0.037 \pm 0.009$ | $t_{\text{CD}} = 1.44$<br>$t_{\text{P}} = 1.45$              | $> 0.05$<br>$> 0.05$               | C: $0.039 \pm 0.007$<br>Cd: $0.066 \pm 0.009$<br>P: $0.064 \pm 0.013$ | $t_{\text{CD}} = 1.31$<br>$t_{\text{P}} = 1.24$              | $> 0.05$<br>$> 0.05$               |
| Excitatory PSD area of SA-containing spine [ $\mu\text{m}^2$ ]  | C: $0.074 \pm 0.008$<br>Cd: $0.075 \pm 0.012$<br>P: $0.100 \pm 0.011$ | $t_{\text{CD}} = 0.07$<br>$t_{\text{P}} = 1.81$              | $> 0.05$<br>$> 0.05$               | C: $0.087 \pm 0.017$<br>Cd: $0.098 \pm 0.027$<br>P: $0.119 \pm 0.014$ | $t_{\text{CD}} = 0.55$<br>$t_{\text{P}} = 1.61$              | $> 0.05$<br>$> 0.05$               |
| Inhibitory PSD area of sER-free spine [ $\mu\text{m}^2$ ]       |                                                                       |                                                              |                                    | C: $0.009 \pm 0.001$<br>Cd: $0.012 \pm 0.001$<br>P: $0.015 \pm 0.003$ | F = 7.43<br>$t_{\text{CD}} = 0.60$<br>$t_{\text{P}} = 1.12$  | 0.0011<br>$> 0.05$<br>$> 0.05$     |
| Inhibitory PSD area of sER-containing spine [ $\mu\text{m}^2$ ] |                                                                       |                                                              |                                    | C: $0.013 \pm 0.002$<br>Cd: $0.029 \pm 0.006$<br>P: $0.021 \pm 0.004$ | $t_{\text{CD}} = 2.87$<br>$t_{\text{P}} = 1.47$              | $< 0.05$<br>$> 0.05$               |
| Inhibitory PSD area of SA-containing spine [ $\mu\text{m}^2$ ]  |                                                                       |                                                              |                                    | C: $0.019 \pm 0.003$<br>Cd: $0.037 \pm 0.006$<br>P: $0.023 \pm 0.005$ | $t_{\text{CD}} = 3.21$<br>$t_{\text{P}} = 0.79$              | $< 0.01$<br>$> 0.05$               |

C – control mice; Cd – conditioned mice; P – pseudoconditioned mice
